# Supplementary material for: Linum lewisii Adventitious and Hairy-Roots Cultures as Lignan Plant Factories
Source: MDPI journal article supplement (doi:10.3390/antiox11081526), 2022-08-05
Supplement: s1 [file s1]

# Linum lewisii adventitious and hairy-roots cultures as lignan plant factories

## Supplementary Materials

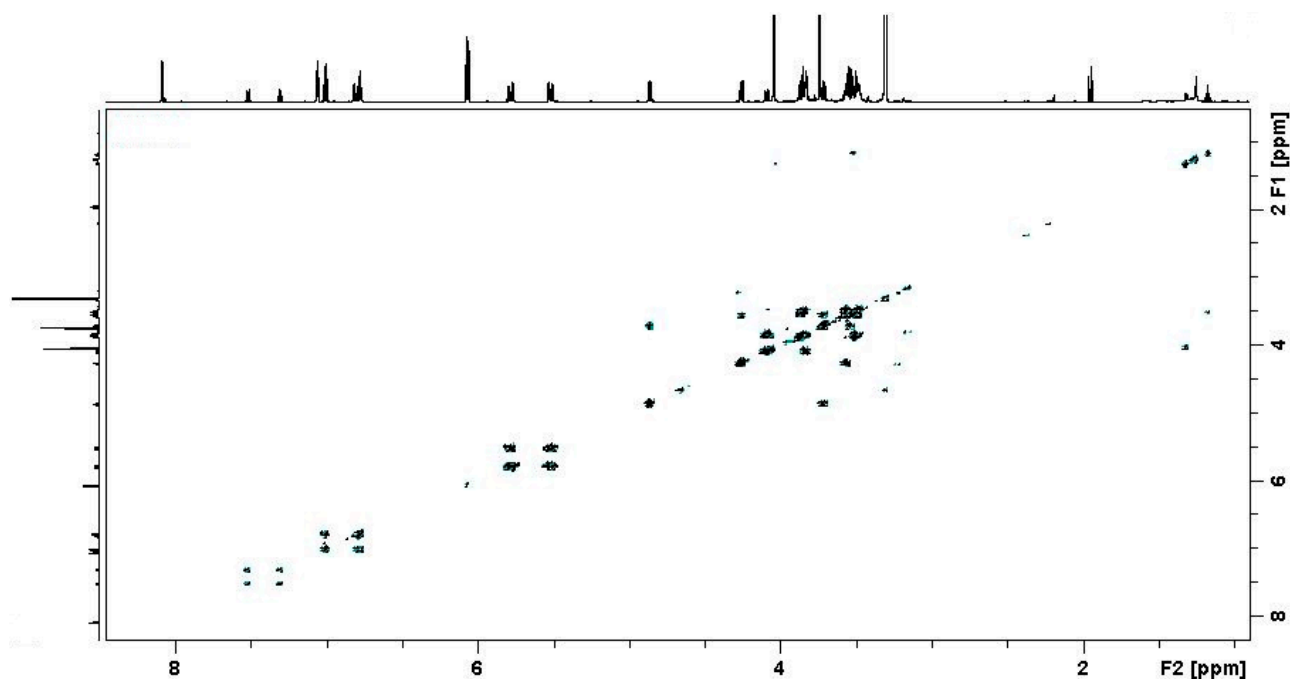

Figure S1. COSY-DQF of 7-O-β-D-xylofuranosyl-(1→5)-O-β-D-xylofuranosyl-diphyllin.

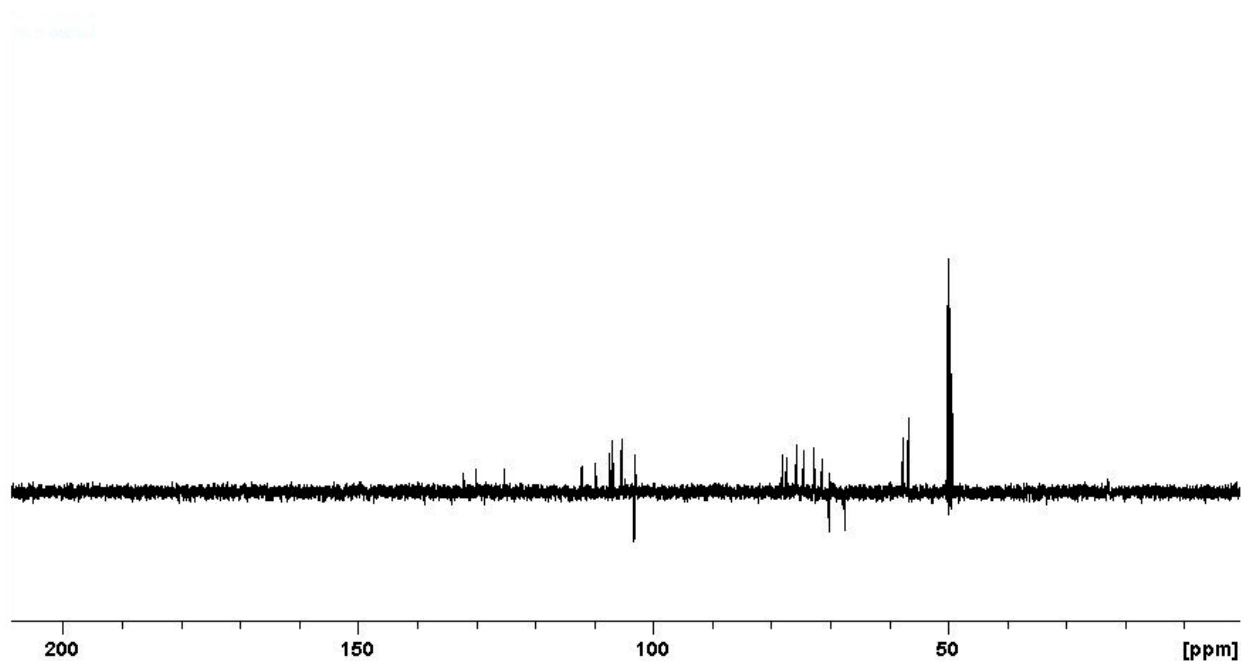

Figure S2. <sup>13</sup>C DEPT-135 of 7-O-β-D-xylofuranosyl-(1→5)-O-β-D-xylofuranosyl-diphyllin.

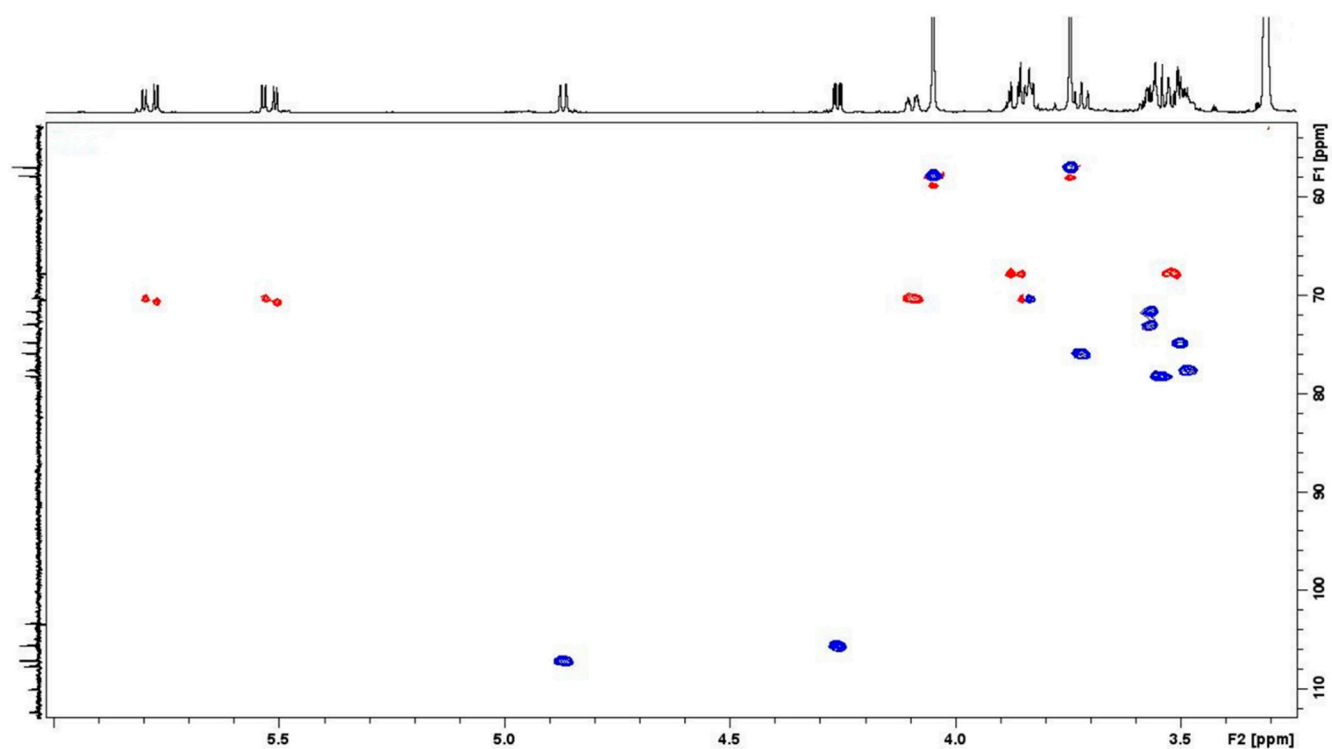

**Figure S3.**  $^1\text{H}$ - $^{13}\text{C}$  edited HSQC of 7-O- $\beta$ -D-xylofuranosyl-(1 $\rightarrow$ 5)-O- $\beta$ -D-xylofuranosyl-diphyllin.

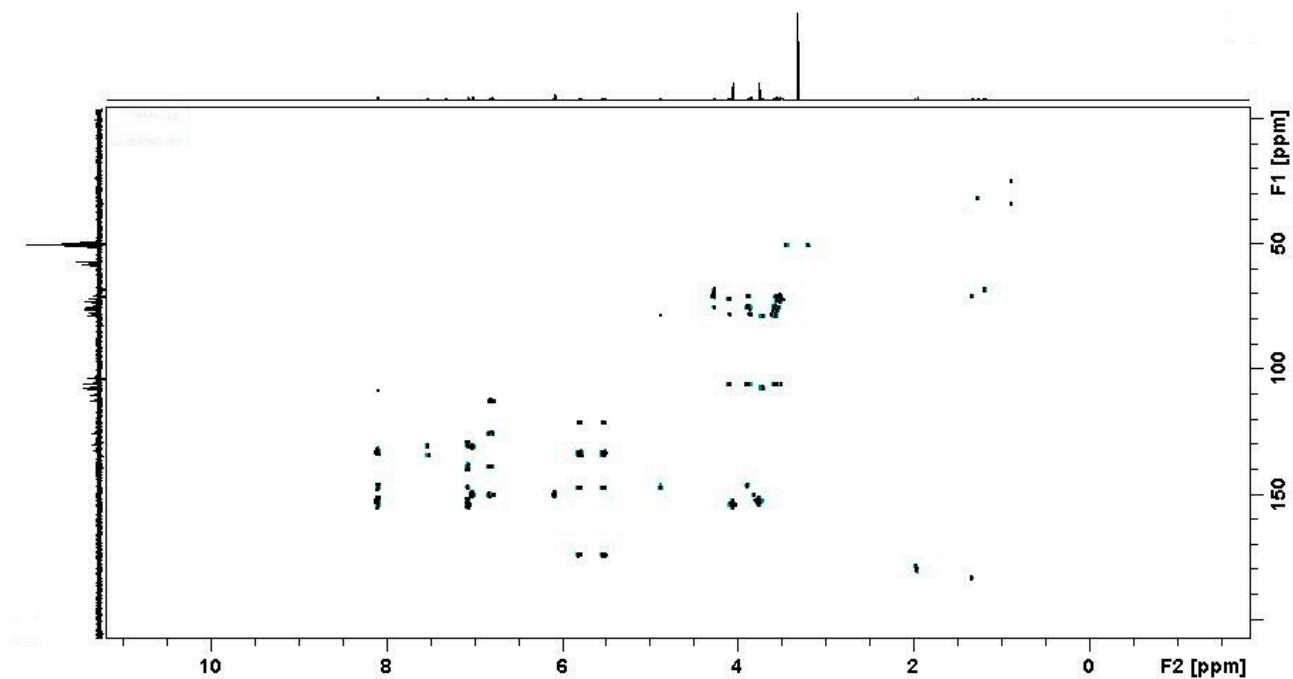

**Figure S4.**  $^1\text{H}$ - $^{13}\text{C}$  HMBC of 7-O- $\beta$ -D-xylofuranosyl-(1 $\rightarrow$ 5)-O- $\beta$ -D-xylofuranosyl-diphyllin.

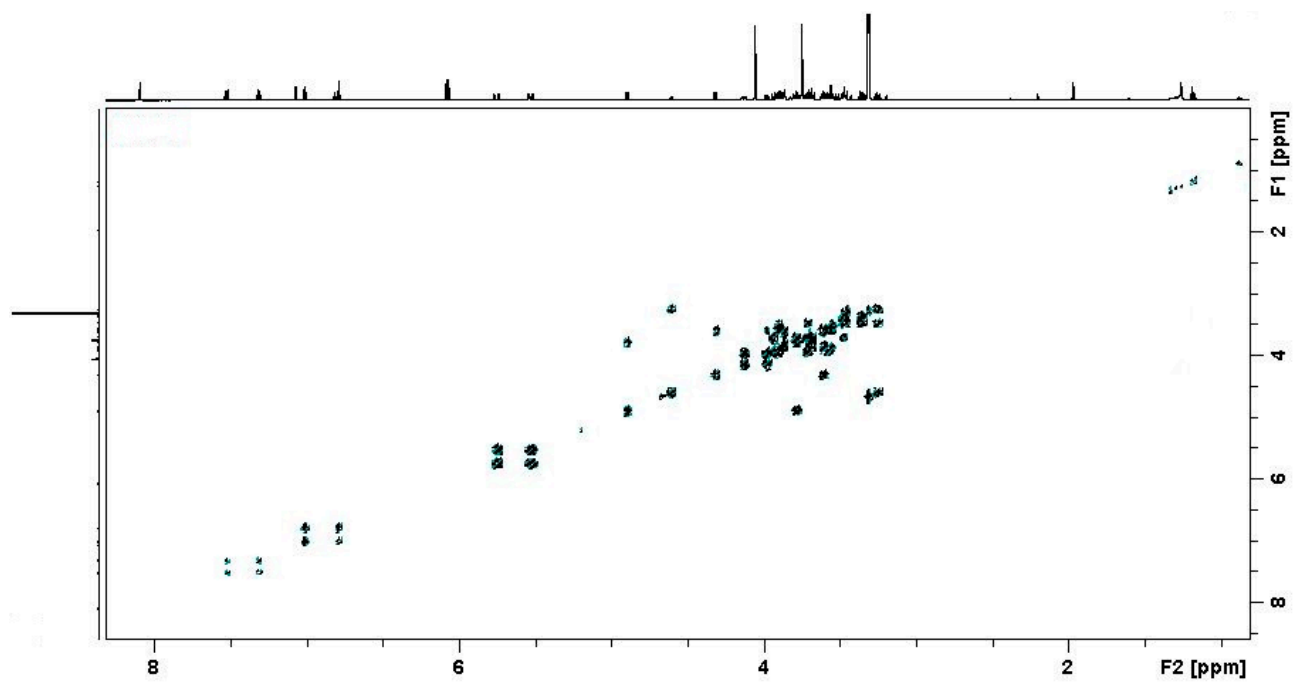

**Figure S5.** COSY-DQF of 7-O- $\beta$ -D-xylofuranosyl-(1 $\rightarrow$ 5)-O- $\beta$ -D-xylofuranosyl-(1 $\rightarrow$ 5)-O- $\beta$ -D-glucosyl-diphyllin.

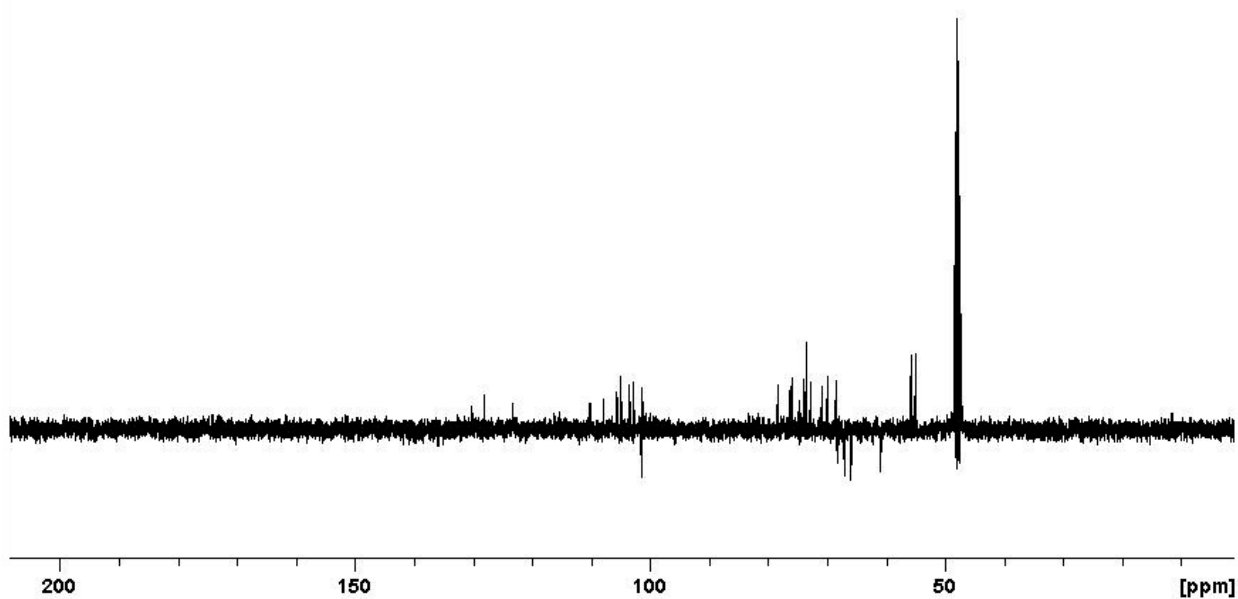

**Figure S6.**  $^{13}\text{C}$  DEPT-135 of 7-O- $\beta$ -D-xylofuranosyl-(1 $\rightarrow$ 5)-O- $\beta$ -D-xylofuranosyl-(1 $\rightarrow$ 5)-O- $\beta$ -D-glucosyl-diphyllin.

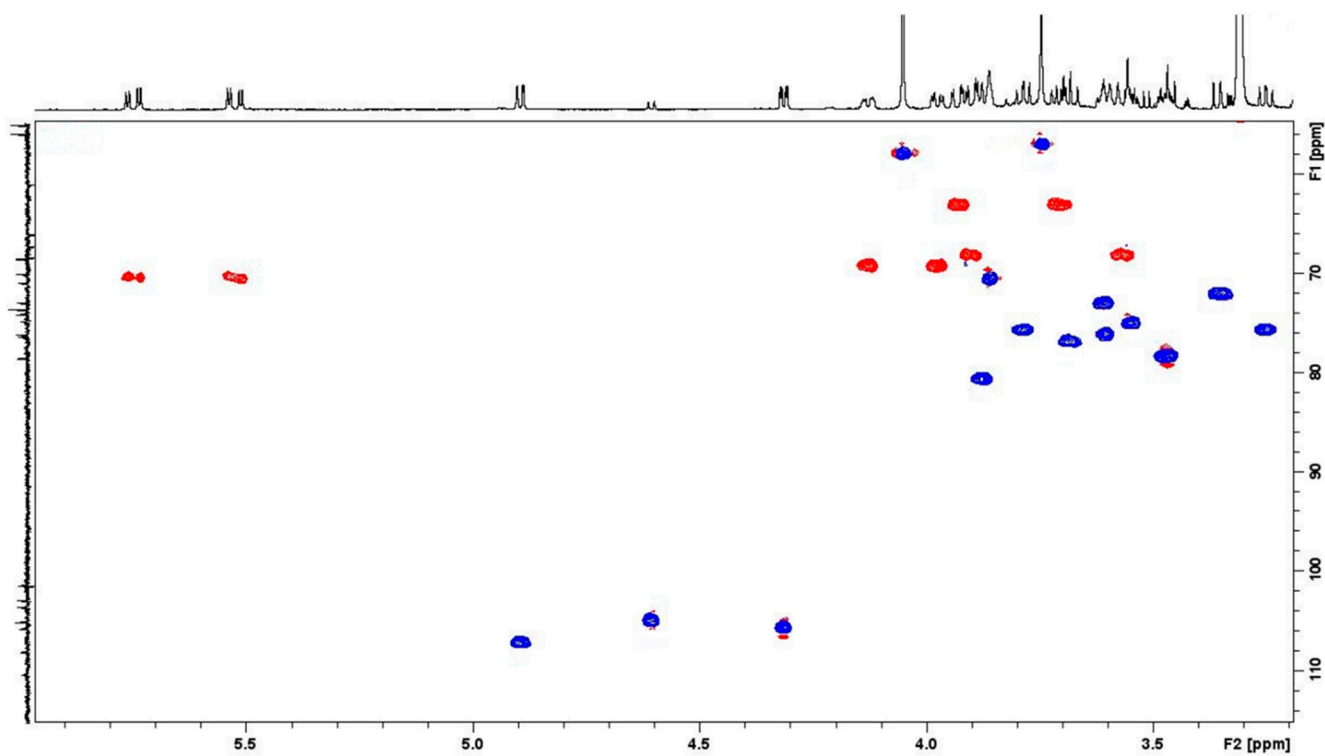

**Figure S7.**  $^1\text{H}$ - $^{13}\text{C}$  edited HSQC of 7-O- $\beta$ -D-xylofuranosyl-(1 $\rightarrow$ 5)-O- $\beta$ -D-xylofuranosyl-(1 $\rightarrow$ 5)-O- $\beta$ -D-glucosyl-diphyllin.

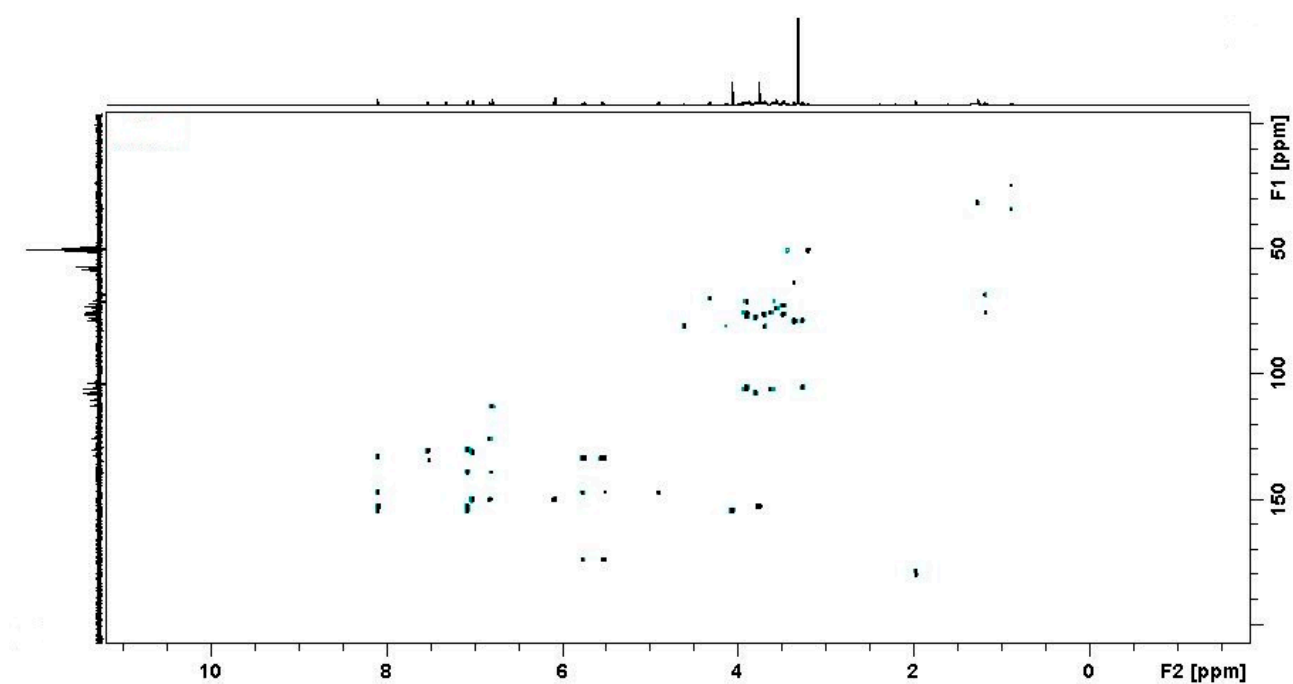

**Figure S8.**  $^1\text{H}$ - $^{13}\text{C}$  HMBC of 7-O- $\beta$ -D-xylofuranosyl-(1 $\rightarrow$ 5)-O- $\beta$ -D-xylofuranosyl-(1 $\rightarrow$ 5)-O- $\beta$ -D-glucosyl-diphyllin.
